# Supplementary material for: Involvement of Mitochondrial Dysfunction in FOXG1 Syndrome
Source: MDPI journal article supplement (doi:10.3390/genes14020246), 2023-01-17
Supplement: s1 [file s1]

## Supplementary Materials

**Table S1.** Clinical features of the individuals investigated in this study and information on fibroblast cultures.

| Fibroblast | Coriell ID | Sex | Symptoms                                                                                                                                                                                                                                                                                           | <i>FOXG1</i> variant (NM_005249.5) | Age# | Passage |
|------------|------------|-----|----------------------------------------------------------------------------------------------------------------------------------------------------------------------------------------------------------------------------------------------------------------------------------------------------|------------------------------------|------|---------|
| F1         | GM27190    | F   | Global developmental delay (cannot sit unsupported, cannot walk or crawl), non-verbal, failure to thrive, microcephaly, epilepsy, hypotonia, dystonia, spasticity, cortical vision impairment, gastrointestinal reflux                                                                             | c.924G>A p.(Trp308*)               | 6    | 8       |
| F2         | GM27246    | F   | Microcephaly; psychomotor retardation                                                                                                                                                                                                                                                              | c.256dup p.(Gln86Profs*35)         | 4    | 8       |
| F3         |            | F   | Severe intellectual disability, microcephaly, refractory epilepsy, hypotonia, tetraplegia, abnormal MRI findings at age 45 years (bilateral hippocampal malrotation, supratentorial hypomyelination, simplified gyral pattern, atrophy of the cerebellum), cortical vision impairment, height -2SD | c.689G>A p.(Arg230His)             | 51   | 7       |
| F4         |            | M   | Severe intellectual disability, microcephaly, epilepsy, hypotonia, wheelchair bound, abnormal MRI findings at age 4 years (delayed myelination), myopia, height -1SD                                                                                                                               | c.643T>G p.(Phe215Val)             | 9    | 7       |
| F5         |            | M   | Intellectual disability, microcephaly, epilepsy, hypotonia, can walk very short distances, myopia, height -2SD                                                                                                                                                                                     | c.565C>T p.(Leu189Phe)             | 6    | 7       |
| C1         | GM00041    | F   | No symptoms                                                                                                                                                                                                                                                                                        | Normal                             | 0    | 7       |
| C2         | GM00969    | F   | No symptoms                                                                                                                                                                                                                                                                                        | Normal                             | 2    | 10      |
| C3         | GM08447    | F   | No symptoms                                                                                                                                                                                                                                                                                        | Normal                             | 0    | 8       |
| C4         |            | F   | No symptoms                                                                                                                                                                                                                                                                                        | Normal                             | 35   | 7       |
| C5         | GM02036    | F   | No symptoms                                                                                                                                                                                                                                                                                        | Normal                             | 11   | 10      |
| C6         | GM01652    | F   | No symptoms                                                                                                                                                                                                                                                                                        | Normal                             | 11   | 10      |

#Age (years) when biopsy was taken; M, male; F, female; ID, Identification.

**Table S2.** RT-PCR and Sanger sequencing: Primers and Conditions.

| Gene                                 | Primer                                          | Sequence                   |
|--------------------------------------|-------------------------------------------------|----------------------------|
| FOXG1                                | FW                                              | 5'-CATGTCGCCCTTCCTGTC-3'   |
|                                      | RV                                              | 5'-GAGTCAACACGGAGCTGTAG-3' |
| PCR Master mix (30 µl pr. reaction)  |                                                 |                            |
| FOXG1                                | 5 µl cDNA                                       |                            |
|                                      | 0.5 µl of each primer (20 µM)                   |                            |
|                                      | 0.5 µl dNTP mix (2.5 mM of each)                |                            |
|                                      | 6 µl 5x Q-solution                              |                            |
|                                      | 3 µl 10x PCR buffer                             |                            |
|                                      | 0.1 µl HotStarTaq® DNA polymerase               |                            |
|                                      | 14.4 µl sterile H2O                             |                            |
| PCR conditions                       |                                                 |                            |
| 95°C                                 |                                                 | 15m                        |
| 95°C                                 | 1m                                              | X40 cycles                 |
| 52 °C                                | 1m                                              |                            |
| 72°C                                 | 1m                                              |                            |
| 72°C                                 |                                                 | 7m                         |
| Sequencing Master mix (pr. reaction) |                                                 |                            |
| FOXG1                                | 2 µl PCR product                                |                            |
|                                      | 1 µl BigDye™ Terminator v3.1 Ready Reaction Mix |                            |
|                                      | 1.5 µl BigDye™ Terminator 5x Sequencing buffer  |                            |
|                                      | 0.3 µl FW/RV primer                             |                            |
|                                      | 5.2 µl sterile H2O                              |                            |
| Sequencing conditions                |                                                 |                            |
| 98°C                                 |                                                 | 1m                         |
| 98°C                                 | 10s                                             | X25 cycles                 |

|      |    |
|------|----|
| 50°C | 5s |
| 60°C | 4m |

**Table S3.** RT-qPCR: Taqman Probes.

| Target gene  | Assay ID       |
|--------------|----------------|
| <i>TFAM</i>  | #Hs01082775_m1 |
| <i>PINK1</i> | #Hs00260868_m1 |
| <i>PARK2</i> | #Hs01038318_m1 |
| <i>DNML1</i> | #Hs01552597_g1 |
| <i>MFN1</i>  | #Hs00966851_m1 |
| <i>MFN2</i>  | #Hs00208382_m1 |
| <i>OPA1</i>  | #Hs01047013_m1 |
| <i>GAPDH</i> | #Hs02786624_g1 |
| <i>GUSB</i>  | #Hs00939627_m1 |

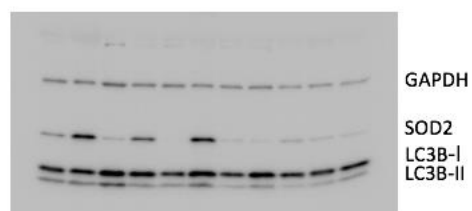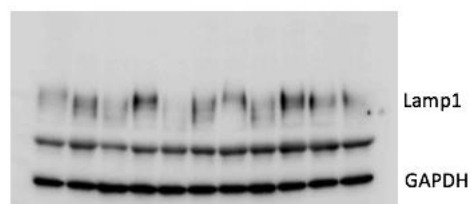

**Raw western blot membranes with indicated proteins**

**Figure S1.** Raw Western blot membranes with indicated proteins.
